# Supplementary material for: Assessing the reliability of computing ion pair lifetimes and self-diffusivity to predict experimental viscosity trends of ionic liquids
Source: Royal Society of Chemistry journal article supplement (doi:10.1039/c7me00015d), 2017-01-01
Supplement: c7me00015d2.zip [file c7me00015d2.zip]

Electronic Supplementary Information for:  
Assessing the Reliability of Computing Ion Pair Lifetimes and  
Diffusivity to Predict Experimental Viscosity Trends of Ionic  
Liquids

Michael T. Humbert, Yong Zhang, Edward J. Maginn

Department of Chemical and Biomolecular Engineering, University of Notre Dame, Notre  
Dame, Indiana 46556, United States

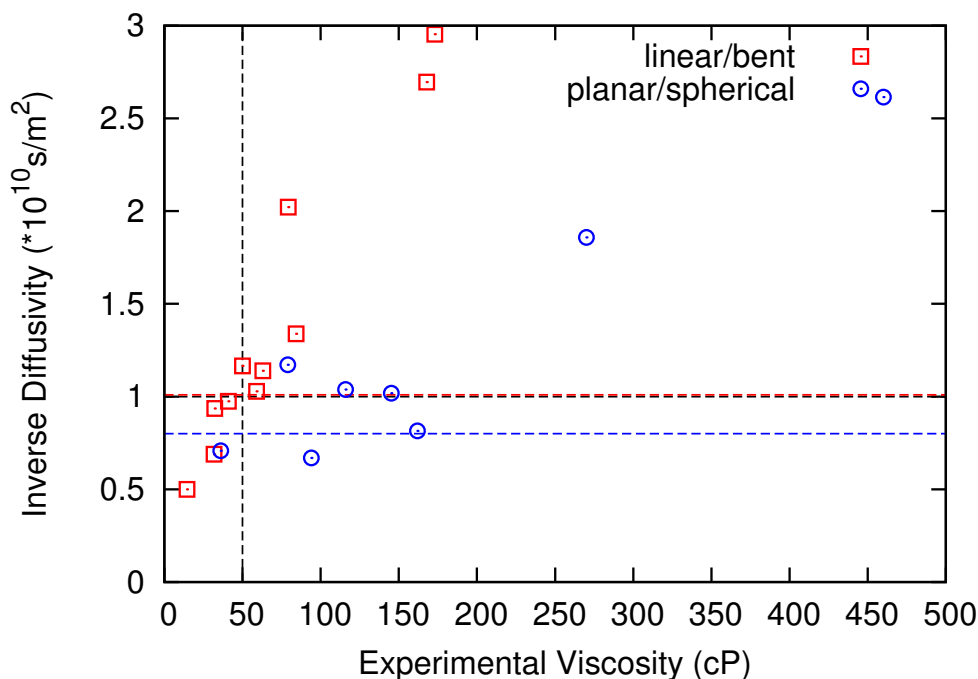

Figure S1: Inverse self-diffusivity vs experimental viscosities for selected ILs. Dashed lines represent various cutoffs used in predictions. The uncertainty estimates were smaller than the symbol size and thus excluded for clarity. Diffusivities were corrected for system size effects using viscosities obtained from a Vogel-Fulcher-Tammann fitting of experimental viscosities

Table S1: All experimental(298 K) and computed (400 K) data used in the analysis. Viscosities have units of cP, ion pair lifetimes have units of ps and diffusivities have units of  $\text{*}10^{-11} \text{ m}^2/\text{s}$ . Empty Cells represent ionic liquids without Vogel-Fulcher-Tammann parameters so system size corrections were not possible

| Ion Pair          | Experimental Viscosity | Ion Pair Lifetime | Diffusivity (uncorrected) | Diffusivity (Corrected) | Group            |
|-------------------|------------------------|-------------------|---------------------------|-------------------------|------------------|
| [C4C1IM] [NTF2]   | 50 <sup>1</sup>        | 699 $\pm$ 8       | 4.7 $\pm$ 0.9             | 8.5 $\pm$ 0.9           | Linear/Branched  |
| [C2C1IM] [NTF2]   | 32.2 <sup>2</sup>      | 488 $\pm$ 7       | 6.3 $\pm$ 2.0             | 10.7 $\pm$ 2.0          | Linear/Branched  |
| [C4C1PYR] [NTF2]  | 79.3 <sup>3</sup>      | 1597 $\pm$ 72     | 2.0 $\pm$ 0.4             | 4.9 $\pm$ 0.4           | Linear/Branched  |
| [C4C1PY] [NTF2]   | 63 <sup>4</sup>        | 678 $\pm$ 35      | 5.4 $\pm$ 1.1             | 8.8 $\pm$ 1.1           | Linear/Branched  |
| [C4PY] [NTF2]     | 59.0 <sup>5</sup>      | 604 $\pm$ 6       | 5.9 $\pm$ 1.5             | 9.7 $\pm$ 4.5           | Linear/Branched  |
| [C4C1PIP] [NTF2]  | 173 <sup>6</sup>       | 3146 $\pm$ 335    | 0.9 $\pm$ 0.2             | 3.4 $\pm$ 0.2           | Linear/Branched  |
| [P2228] [NTF2]    | 129 <sup>7</sup>       | 1793 $\pm$ 197    | 2.3 $\pm$ 0.2             |                         | Linear/Branched  |
| [C4C1IM] [OTF]    | 84.3 <sup>1</sup>      | 706 $\pm$ 29      | 4.3 $\pm$ 1.1             | 7.5 $\pm$ 1.1           | Linear/Branched  |
| [C2C1IM] [OTF]    | 41 <sup>8</sup>        | 433 $\pm$ 12      | 6.0 $\pm$ 1.4             | 10.3 $\pm$ 1.4          | Linear/Branched  |
| [C4C1PYR] [OTF]   | 167.8 <sup>9</sup>     | 1636 $\pm$ 31     | 1.3 $\pm$ 0.2             | 3.7 $\pm$ 0.2           | Linear/Branched  |
| [C4C1IM] [DCA]    | 31.8 <sup>10</sup>     | 365 $\pm$ 34      | 8.8 $\pm$ 0.9             | 14.5 $\pm$ 0.9          | Linear/Branched  |
| [C2C1IM] [DCA]    | 14.5 <sup>11</sup>     | 249 $\pm$ 29      | 12.3 $\pm$ 1.3            | 20.0 $\pm$ 1.3          | Linear/Branched  |
| [P2224] [DCA]     | 60 <sup>12</sup>       | 294 $\pm$ 15      | 11.9 $\pm$ 3.7            |                         | Linear/Branched  |
| [P2228] [DCA]     | 104 <sup>12</sup>      | 708 $\pm$ 51      | 6.6 $\pm$ 1.8             |                         | Linear/Branched  |
| [C4C1IM] [PF6]    | 261 <sup>13</sup>      | 852 $\pm$ 109     | 3.1 $\pm$ 0.8             |                         | Planar/Spherical |
| [C4C1IM] [BF4]    | 116 <sup>13</sup>      | 496 $\pm$ 48      | 6.0 $\pm$ 1.0             | 9.6 $\pm$ 1.0           | Planar/Spherical |
| [C2C1IM] [BF4]    | 36.1 <sup>11</sup>     | 270 $\pm$ 8       | 9.2 $\pm$ 2.1             | 14.1 $\pm$ 2.1          | Planar/Spherical |
| [C4C1PY] [BF4]    | 166.7 <sup>14</sup>    | 455 $\pm$ 13      | 6.7 $\pm$ 0.9             |                         | Planar/Spherical |
| [C4PY] [BF4]      | 145.2 <sup>14</sup>    | 458 $\pm$ 112     | 6.8 $\pm$ 1.3             | 9.8 $\pm$ 1.3           | Planar/Spherical |
| [C4C1IM] [CNPYR]  | 162 <sup>15</sup>      | 514 $\pm$ 165     | 8.1 $\pm$ 0.8             | 12.2 $\pm$ 0.8          | Planar/Spherical |
| [C2C1IM] [CNPYR]  | 94 <sup>15</sup>       | 283 $\pm$ 52      | 11.2 $\pm$ 1.3            | 14.9 $\pm$ 1.3          | Planar/Spherical |
| [C4C1IM] [4TRIZ]  | 270 <sup>15</sup>      | 980 $\pm$ 47      | 2.7 $\pm$ 0.3             | 5.4 $\pm$ 0.3           | Planar/Spherical |
| [C2C1IM] [4TRIZ]  | 79 <sup>15</sup>       | 447 $\pm$ 5       | 5.2 $\pm$ 0.5             | 8.5 $\pm$ 0.5           | Planar/Spherical |
| [C4C1PYR] [4TRIZ] | 460 <sup>15</sup>      | 2099 $\pm$ 163    | 1.1 $\pm$ 0.1             | 3.8 $\pm$ 0.1           | Planar/Spherical |

## References

- [1] H. Tokuda, K. Hayamizu, K. Ishii, M. A. B. H. Susan and M. Watanabe, *Journal of Physical Chemistry B*, 2004, **108**, 16593–16600.
- [2] H. Tokuda, K. Hayamizu, K. Ishii, A. Bin, H. Susan and M. Watanabe, *The Journal of Physical Chemistry B*, 2005, **109**, 6103–6110.
- [3] G. McHale, C. Hardacre, R. Ge, N. Doy, R. W. K. Allen, J. M. MacInnes, M. R. Bown and M. I. Newton, *Analytical Chemistry*, 2008, **80**, 5806–5811.
- [4] J. M. Crosthwaite, M. J. Muldoon, J. K. Dixon, J. L. Anderson and J. F. Brennecke, *Journal of Chemical Thermodynamics*, 2005, **37**, 559–568.
- [5] H. Tokuda, K. Ishii, M. A. B. H. Susan, S. Tsuzuki, K. Hayamizu and M. Watanabe, *Journal of Physical Chemistry B*, 2006, **110**, 2833–2839.
- [6] M. L. P. Le, F. Alloin, P. Strobel, J. C. Leprêtre, L. Cointeaux and C. P. del Valle, *Ionics*, 2012, **18**, 817–827.
- [7] K. Tsunashima and M. Sugiya, *Electrochemistry Communications*, 2007, **9**, 2353–2358.
- [8] H. Rodríguez and J. Brennecke, *Journal of Chemical and Engineering Data*, 2006, **51**, 2145–2155.
- [9] F. M. Gaciño, T. Regueira, L. Lugo, M. J. P. Comuñas and J. Fernández, *Journal of Chemical and Engineering Data*, 2011, **56**, 4984–4999.
- [10] P. J. Carvalho, T. Regueira, L. M. N. B. F. Santos, J. Fernandez and J. A. P. Coutinho, *Journal of Chemical and Engineering Data*, 2010, **55**, 645–652.
- [11] C. Schreiner, S. Zugmann, R. Hartl and H. J. Gores, *Journal of Chemical and Engineering Data*, 2010, **55**, 1784–1788.
- [12] K. Tsunashima, S. Kodama, M. Sugiya and Y. Kunugi, *Electrochimica Acta*, 2010, **56**, 762–766.
- [13] W. Li, Z. Zhang, B. Han, S. Hu, Y. Xie and G. Yang, *The Journal of Physical Chemistry B*, 2007, **111**, 6452–6456.
- [14] N. D. Khupse and A. Kumar, *Journal of Solution Chemistry*, 2009, **38**, 589–600.
- [15] C. Shi, A. DeSilva, M. Guzman and J. F. Brennecke, *ECS Transactions*, 2012, **50**, 309.
